# Supplementary material for: Freestanding interconnected nanocluster textiles for efficient oxygen evolution reaction
Source: Royal Society of Chemistry journal article supplement (doi:10.1039/d0ta07707k), 2020-01-01
Supplement: d0ta07707k2.pdf [file d0ta07707k2.pdf]

1 Supplementary Information for

2

3 **Freestanding interconnected nanocluster textiles for efficient oxygen evolution reaction**

4

5 Higashi et al.

6

7 Corresponding Author: Shougo Higashi (shigashi@mosk.tytlabs.co.jp).

8

9

10

11 **This PDF file includes:**

12

13           Supplementary Figs. 1-20, Tables 1-4, and refs.1-19

14

15

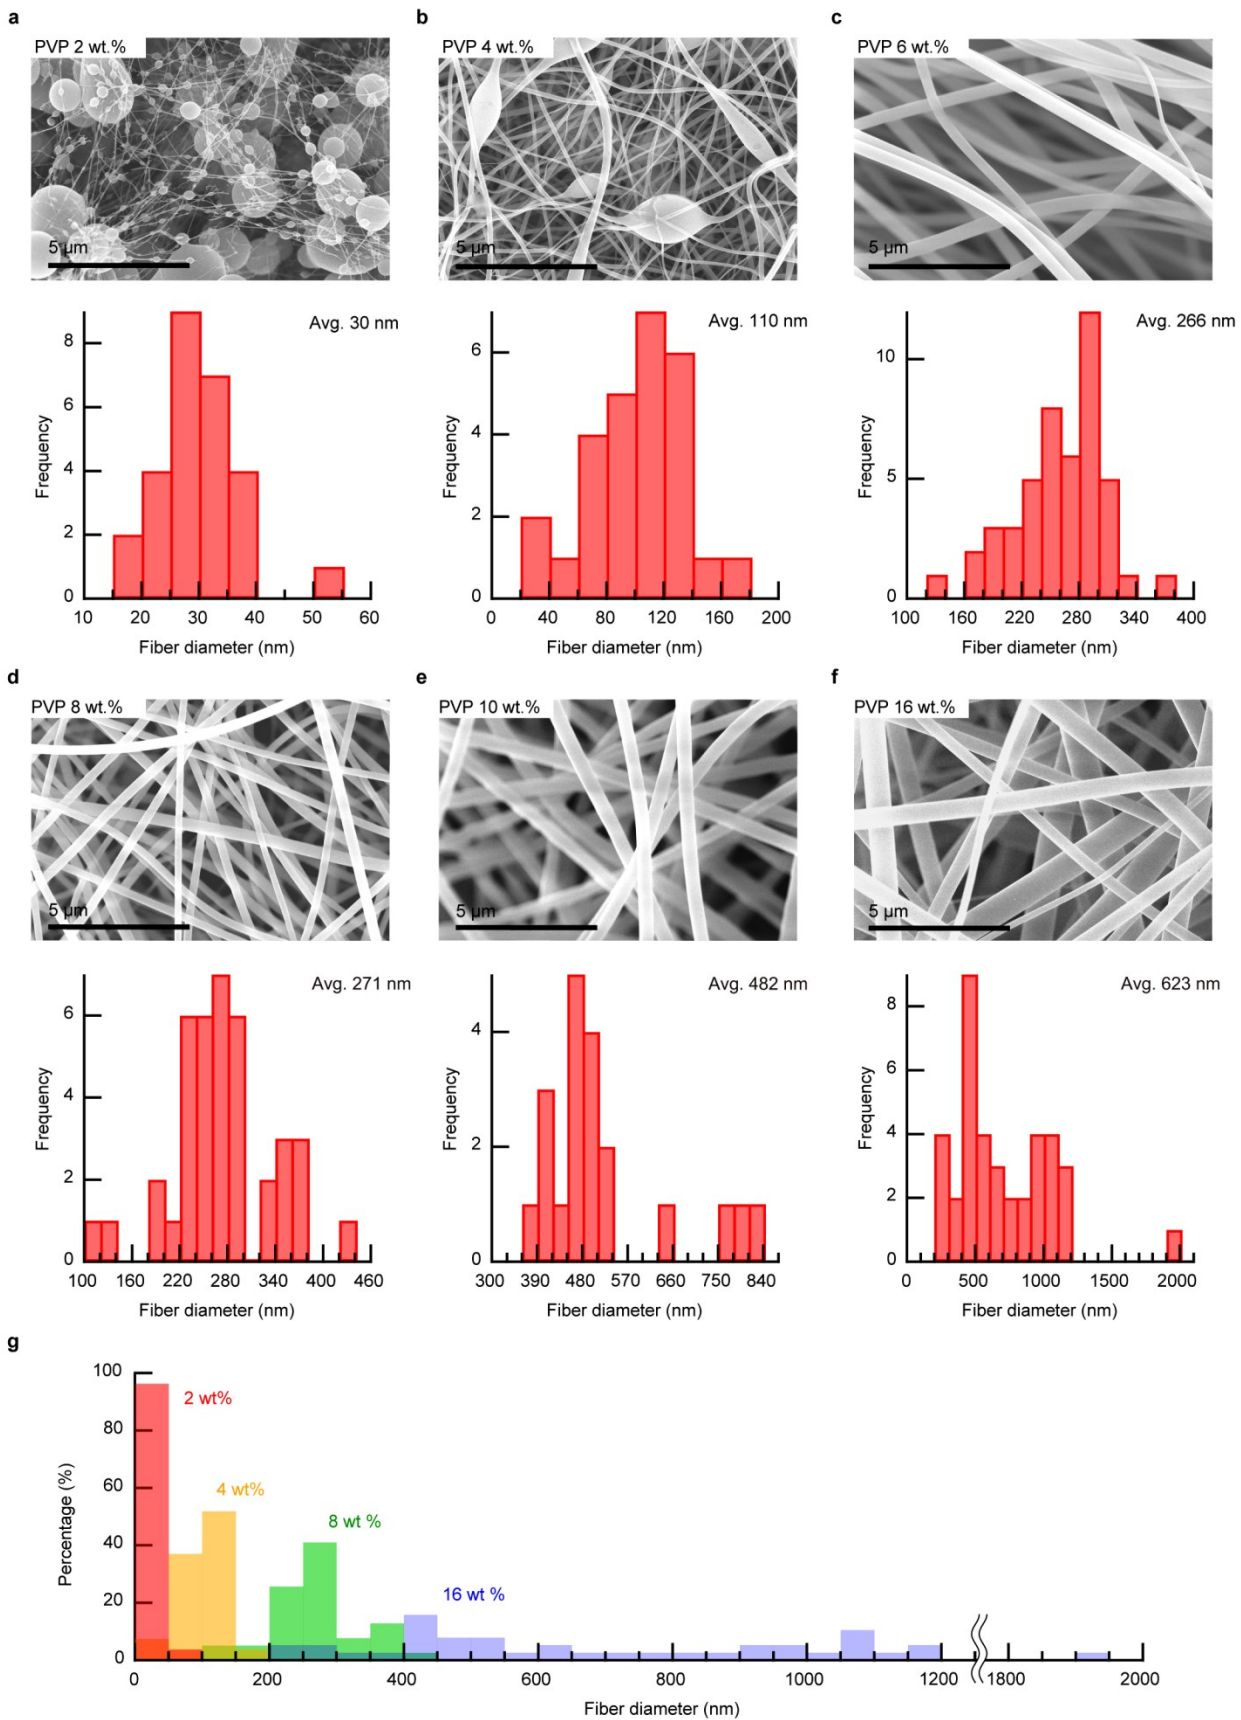

17 **Supplementary Fig. 1: Representative SEM images and fiber diameter distributions of**  
18 **electrospun PVP nanofibers. a, 2 wt.%, b 4 wt.%, c 6 wt.%, d 8 wt.%, e 10 wt.%, and f 16**  
19 **wt.% of PVP in methanol solution. The PVP concentration is mentioned at the top left of the**  
20 **figure. The average fiber diameter is shown at the top right of the histogram. g, Summary of fiber**  
21 **diameter distribution for different concentrations of PVP in methanol solution.**  
22

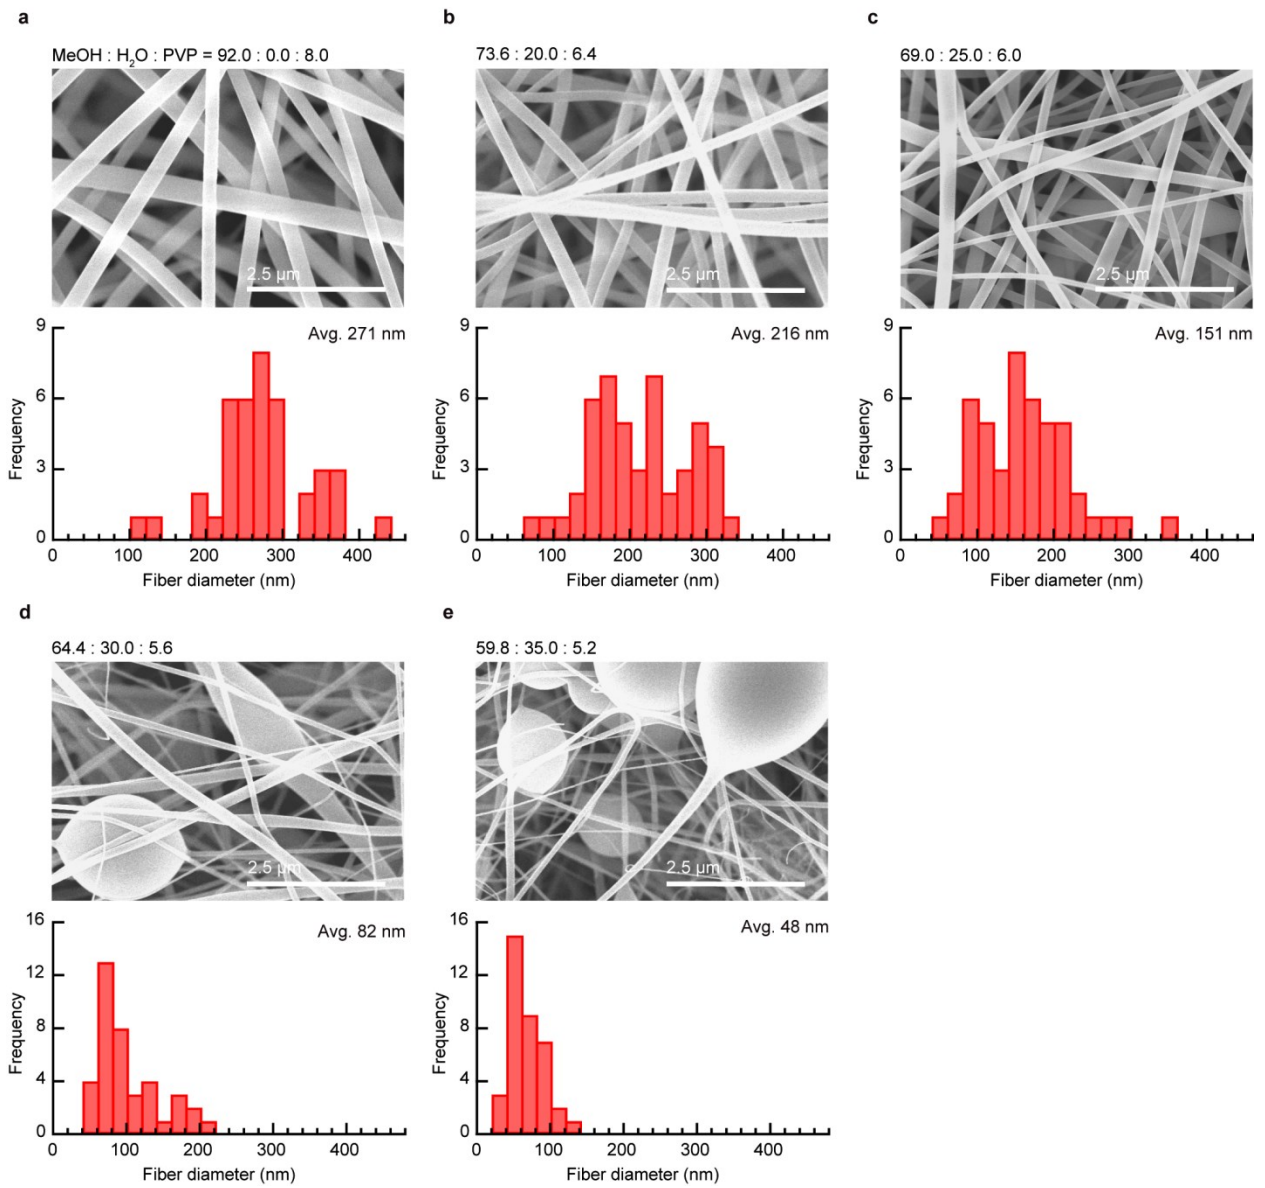

23  
24  
25  
26  
27  
28  
29

**Supplementary Fig. 2: Effect of adding H<sub>2</sub>O into methanol solution on fiber diameter and structure.** The weight fraction of PVP, MeOH, and H<sub>2</sub>O and average fiber diameter are shown at the top left of the SEM image and top right of the histogram, respectively.

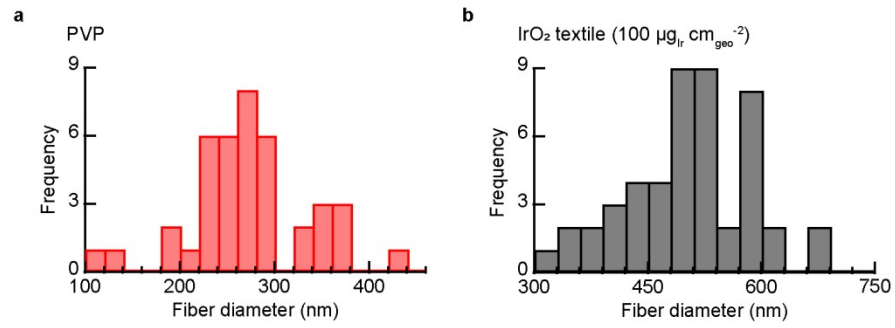

30

31 **Supplementary Fig. 3: Fiber diameter distributions of IrO<sub>2</sub> textile and pristine electrospun**

32 **PVP fiber. a**, Diameter distributions for pristine electrospun PVP nanofibers and **b**, for IrO<sub>2</sub>

33 textiles (271 nm ID with 100 μg<sub>Ir</sub> cm<sup>-2</sup>).

34

35

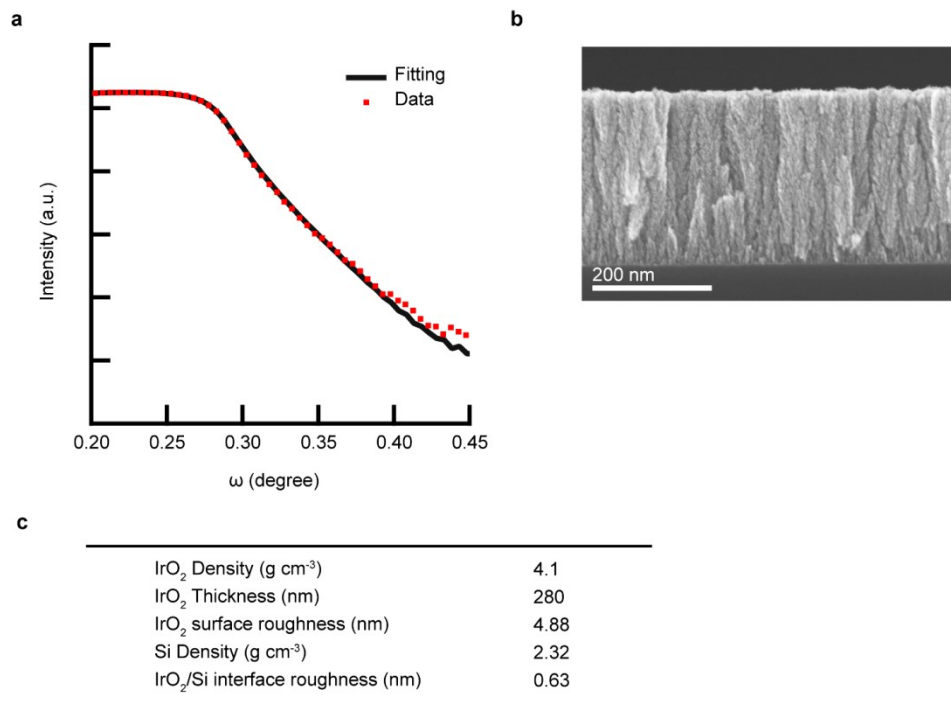

36

37 **Supplementary Fig. 4: IrO<sub>2</sub> film deposited next to the catalyst textile for Ir mass loading**  
 38 **estimation. a**, XRR curve, **b**, SEM image, and **c**, the fitting parameters obtained from the XRR  
 39 curve of the IrO<sub>2</sub> film deposited on the Si substrate placed next to the catalyst textile during  
 40 sputtering. The raw data and the fitting curve are represented by the dots and solid line,  
 41 respectively. The IrO<sub>2</sub> thickness and Si density were fixed parameters. The EDLC of this film  
 42 was also high over 200 Fg<sup>-1</sup>, a same level to the IrO<sub>2</sub> textile we prepared in this work. However,  
 43 the lack of transferability and durability of this film (Fig. 1), which makes it difficult for  
 44 analyzing the surface of the sample at the atomic level, limits practical application despite high  
 45 EDLC.

46

47

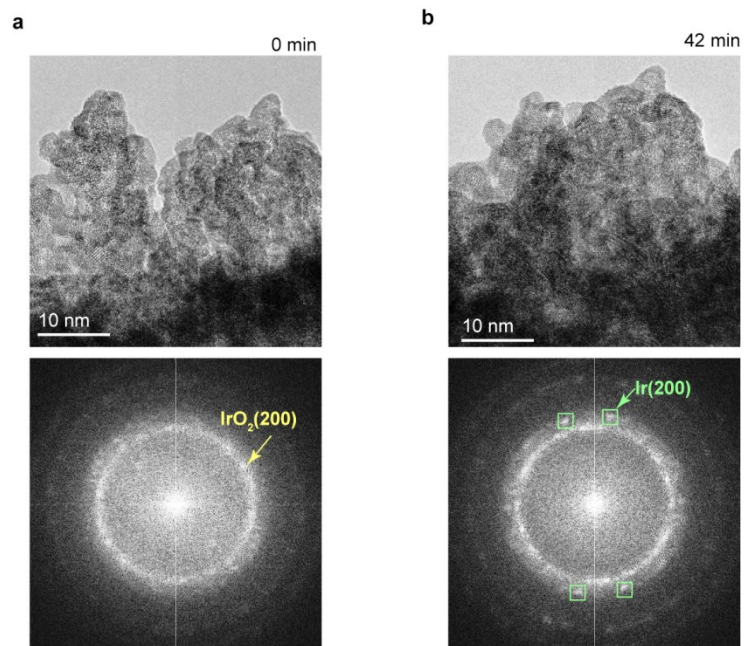

48  
49  
50  
51  
52  
53  
54

**Supplementary Fig. 5: IrO<sub>2</sub> catalyst textile after long-term exposure to the electron beam in TEM. a**, TEM image of the IrO<sub>2</sub> catalyst textile immediately after observation and **b**, after 42 min of irradiation. Corresponding FFT images are also shown.

a

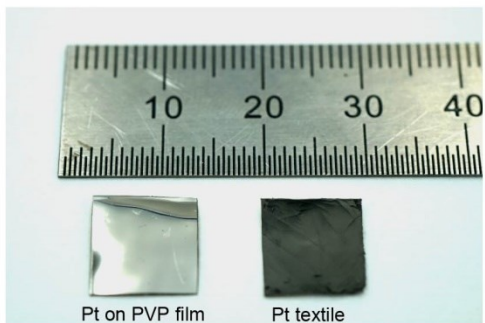

b

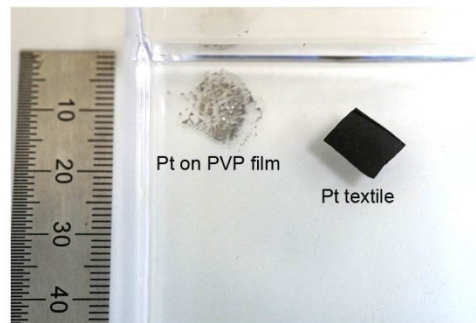

55

56 **Supplementary Fig. 6: Pt on PVP film and on a nanofiber textile.** a, Photograph of Pt on  
57 PVP film and on a nanofiber textile before immersion in water and b, after immersion into water.  
58 While the Pt film disintegrated after immersion, the Pt textile retained its morphology.

59

60



61  
62  
63  
64  
65  
66  
67  
68  
69  
70  
71  
72  
73  
74  
75  
76  
77  
78  
79  
80  
81  
82  
83  
84  
85  
86  
87  
88  
89  
90  
91  
92  
93

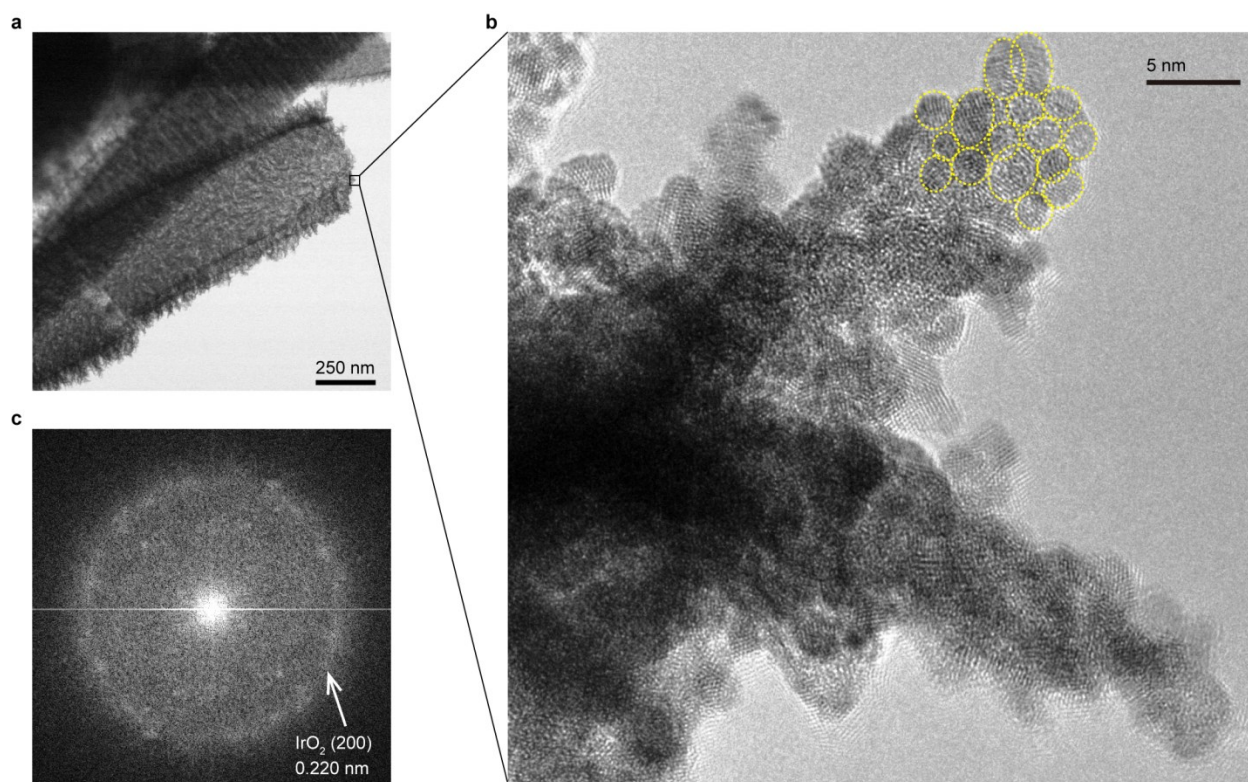

**Supplementary Fig. 7: Structure and morphology of an IrO<sub>2</sub> nanocluster textile.**

**a**, Low-magnification TEM image of a 271 nm ID IrO<sub>2</sub> catalyst textile with mass loading of 100  $\mu\text{g}_{\text{Ir}} \text{cm}^{-2}_{\text{geo}}$ . **b**, HRTEM image of the surface of the IrO<sub>2</sub> catalyst textile (the dotted circles outline the nanoclusters, which form a column  $\sim 5$  nm in diameter). **c**, Fast Fourier Transform (FFT) pattern of the TEM image shown in (b). The Miller index of the IrO<sub>2</sub> rutile structure estimated from the d-spacing is assigned in the image; these values are consistent with the XRD results (Supplementary Fig. 3).

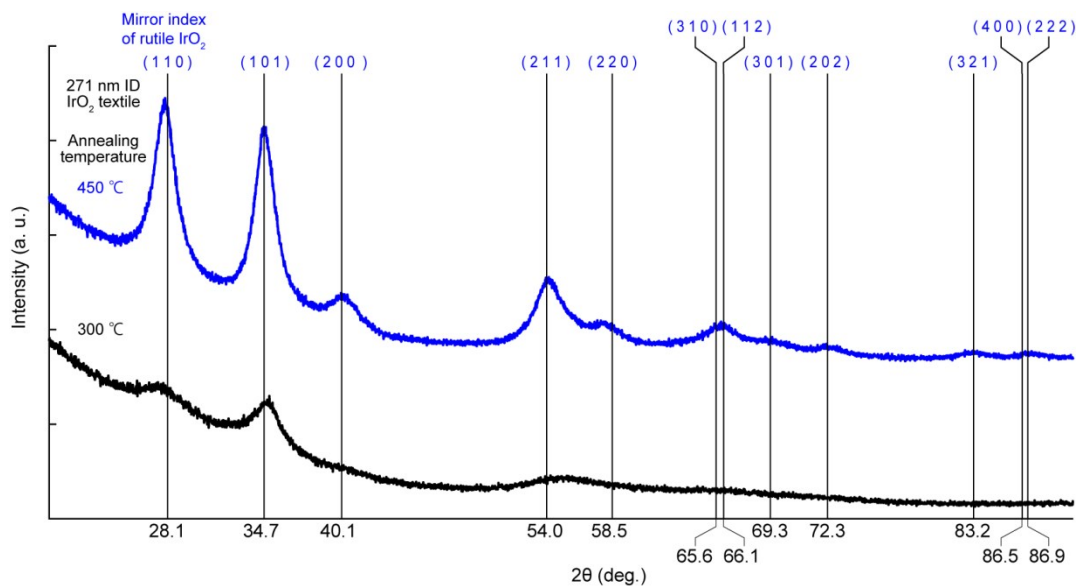

95

96 **Supplementary Fig. 8: Typical XRD pattern of IrO<sub>2</sub> catalyst textiles.** An IrO<sub>2</sub> catalyst textile  
 97 was prepared by annealing at 300 °C and 450 °C for 10 min. The observed peaks matched with  
 98 those of rutile IrO<sub>2</sub> (PDF#00-015-0870. See **Supplementary Table 4** for d-spacing).

99

100

101

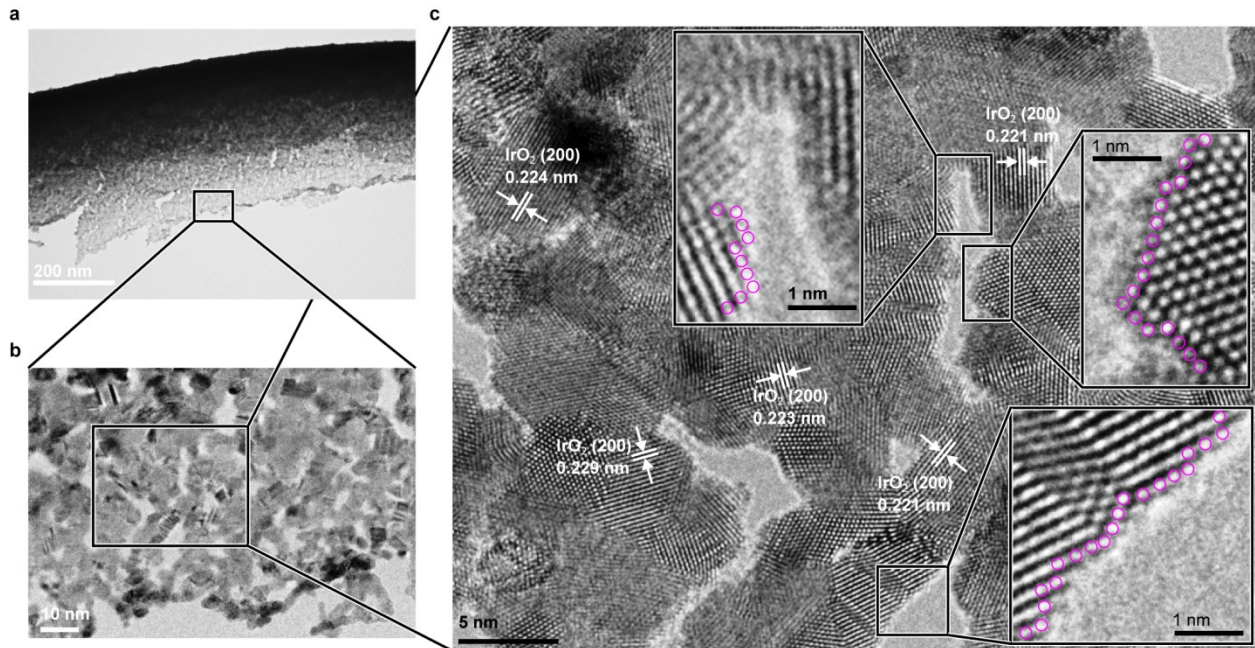

103 **Supplementary Fig. 9: Structure and morphology of an IrO<sub>2</sub> nanocluster textile.** **a**, HR-  
 104 TEM image of the IrO<sub>2</sub> catalyst textile with a mass loading of 10 μg-Ir cm<sup>-2</sup><sub>geo</sub> annealed at 450 °C.  
 105 **b**, Magnified image of (a). Crystal twinning was clearly observed in (c). Surface atoms are  
 106 marked by circles in the close-up image.

107  
 108

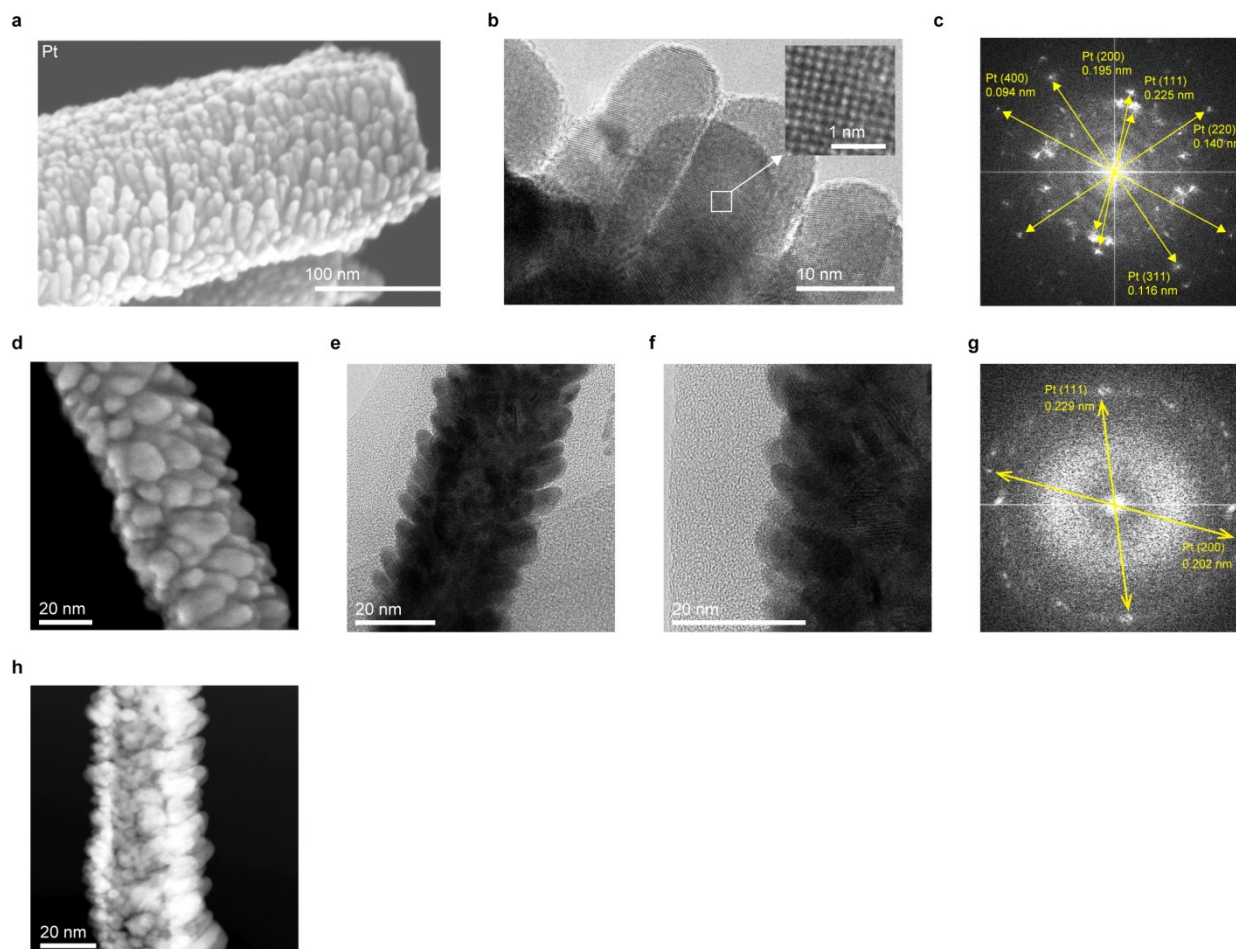

109

110 **Supplementary Fig. 10: SEM, HRTEM, and FFT images of Pt textiles.** **a**, SEM and **b**,  
 111 HRTEM image of a Pt nanocluster array formed on a PVP nanofiber prepared using 8 wt.% PVP  
 112 methanol solution. **c**, FFT pattern of the HRTEM image shown in (**b**). Assigned Miller indices  
 113 for the diffraction spots of Pt are shown. **d**, SEM, **e**, **f**, HRTEM and **h**, DF-STEM image of the Pt  
 114 nanocluster array prepared by depositing Pt on a PVP nanofiber prepared using 2 wt.% PVP  
 115 dissolved methanol solution and **g**, FFT pattern of the HRTEM image shown in (**f**). The Pt  
 116 textiles were prepared by depositing Pt on the as-prepared electro-spun polymer textiles in a  
 117 vacuum chamber by magnetron RF sputtering. During sputtering, the pressure was 7 Pa with Ar  
 118 gas flow.

119

120

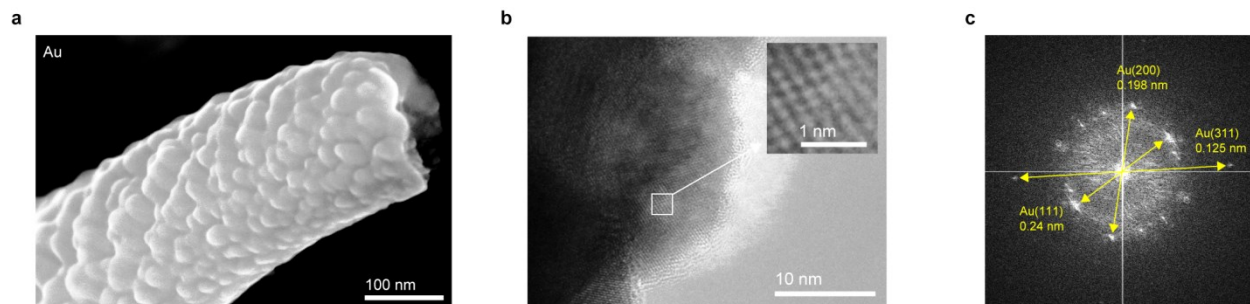

121

122 **Supplementary Fig. 11: SEM, HRTEM, and FFT images of an Au textile.**

123 **a**, SEM and **b**, HRTEM image of Au nanocluster arrays formed on PVP nanofibers made of 8

124 wt.% PVP solution. **c**, FFT pattern of the HRTEM image shown in **(b)**. The Au textile was

125 prepared by depositing Au on the as-prepared electro-spun polymer textiles in a vacuum

126 chamber by magnetron RF sputtering. During sputtering, the pressure was 7 Pa with Ar gas flow.

127

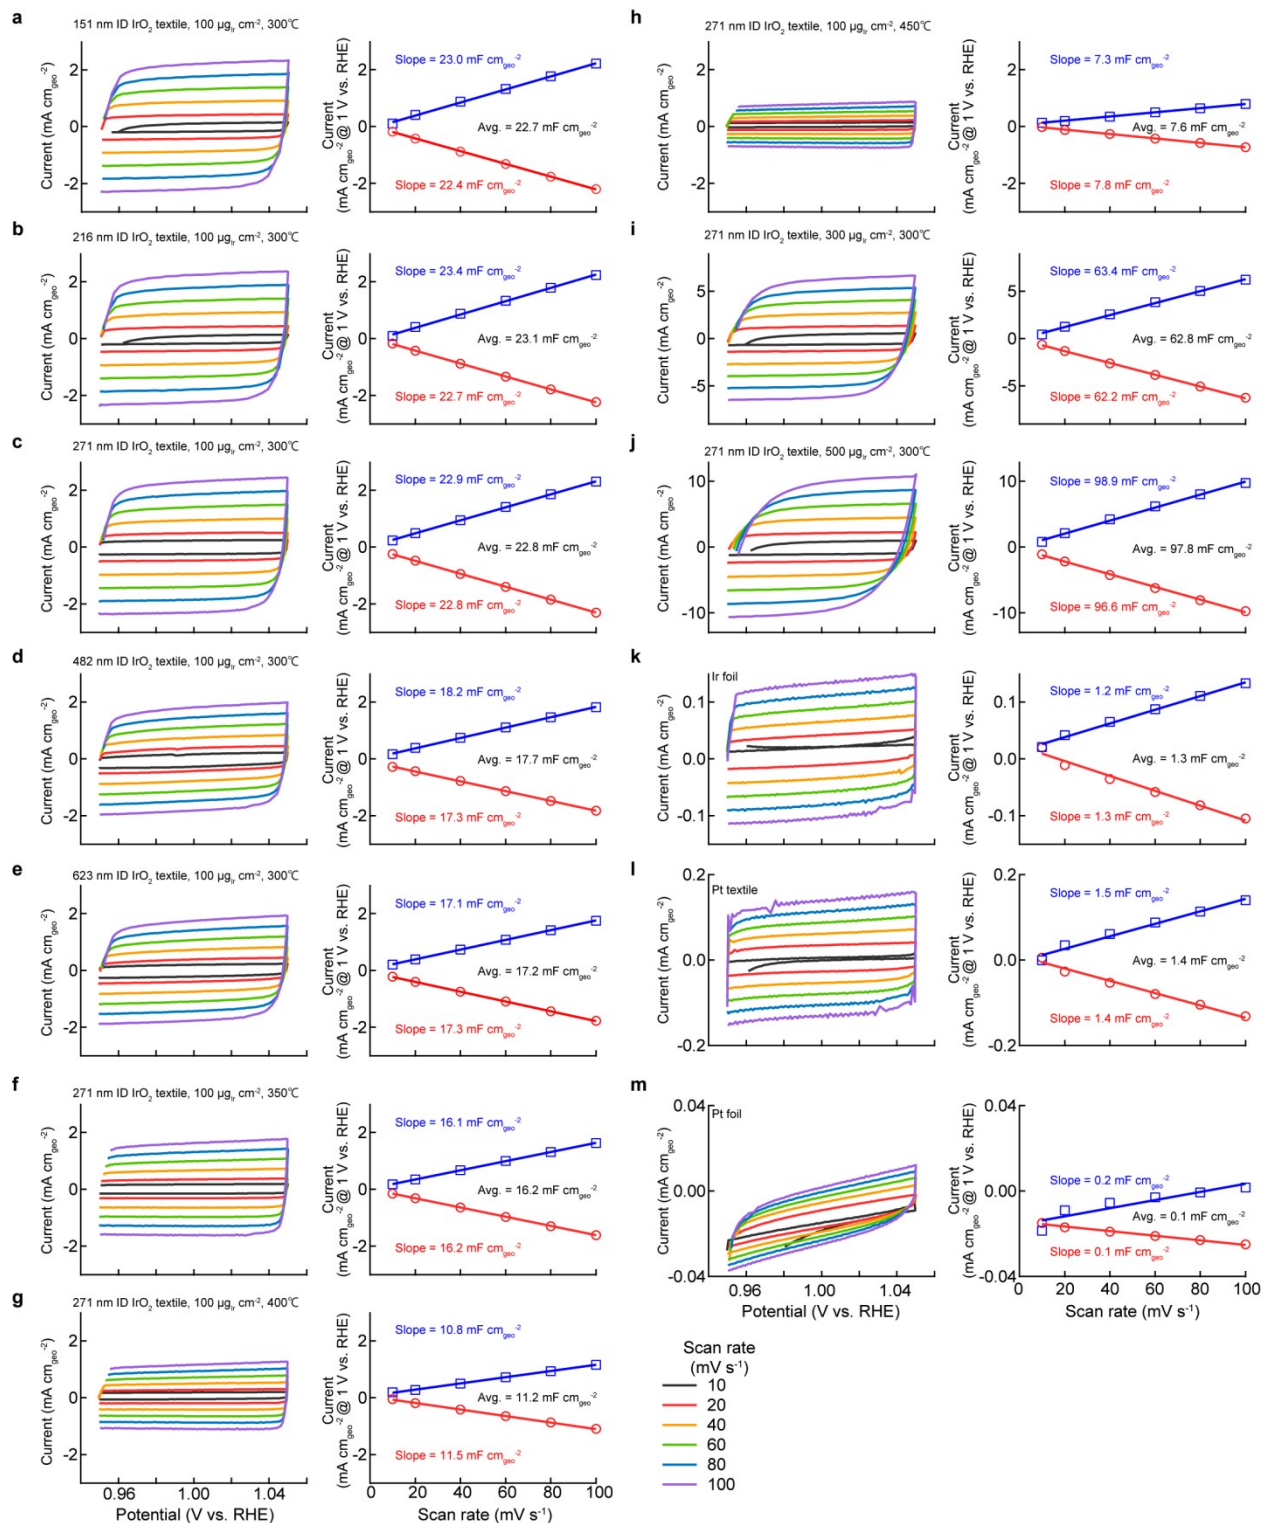

128

129 **Supplementary Fig. 12: Estimation of electric double-layer capacitance (EDLC) for all of**  
 130 **the samples shown in Fig. 3. a-j** IrO<sub>2</sub> catalyst textiles with different IDs, mass loadings, and  
 131 annealing temperatures. **k**, Ir foil, **l**, Pt textile, and **m**, Pt foil. The EDLC is the average of the  
 132 absolute value of the linear slope fit to the data. To estimate the EDLC, we confirmed the

133 absence of any noise and faradaic current for the CV at 1.00 V vs. RHE, where we read the  
134 anodic and cathodic current. The EDLC values are summarized in **Supplementary Table 2**.  
135  
136

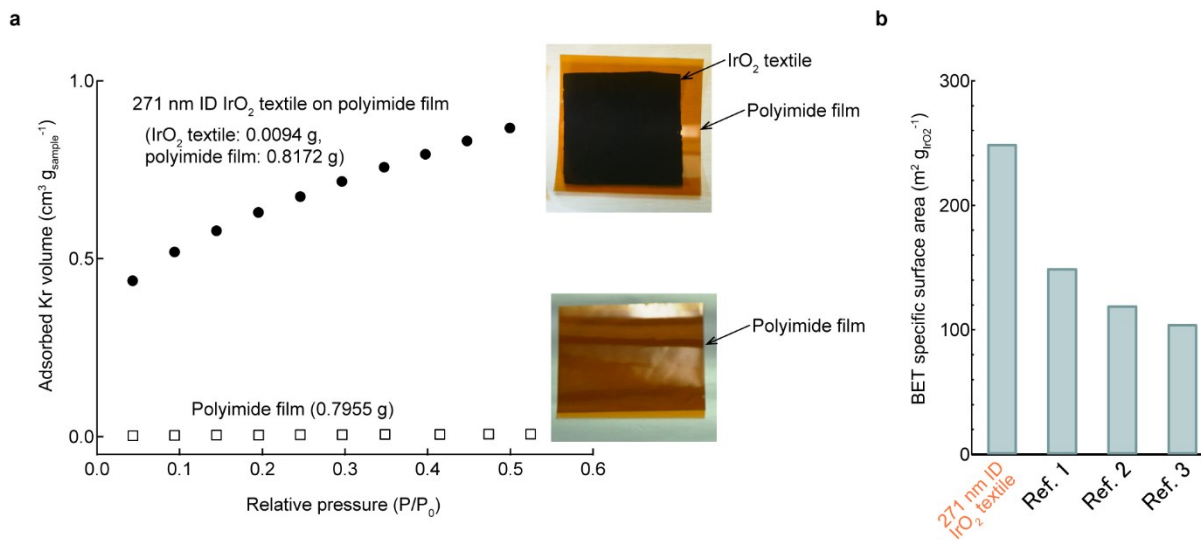

137

138

139 **Supplementary Fig. 13: BET characterization of IrO<sub>2</sub> textile.** **a**, Kr adsorption isotherms at  
 140 -196 °C of IrO<sub>2</sub> textile supported on polyimide film (filled circles). BET surface area was  
 141 calculated from the linear section of BET plot (P/P<sub>0</sub> = 0.09 - 0.3). 3 × 3 cm<sup>2</sup> IrO<sub>2</sub> textile (271 nm  
 142 ID) of 100 μg<sub>Ir</sub> cm<sup>-2</sup> was transferred onto a 3.5 × 3.5 cm<sup>2</sup> polyimide film (0.05 mm thickness),  
 143 and then annealed at 300°C for 10 min. Nine of these samples were prepared, cut into 5 × 5 mm<sup>2</sup>,  
 144 and introduced into the BET measurement cell. Total amount of the BET measured IrO<sub>2</sub> textile  
 145 and polyimide film was 0.0094 g and 0.8172 g, respectively. We confirmed that the BET surface  
 146 area of polyimide film was negligibly small (open squares). **b**, The BET specific surface area of  
 147 the IrO<sub>2</sub> textile compared with previous literature for IrO<sub>2</sub> nanoparticle<sup>1, 2, 3</sup>.

148

149

150



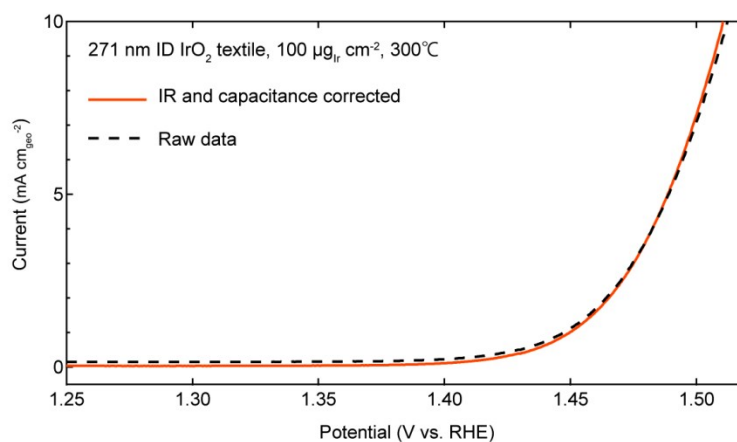

152 **Supplementary Fig. 14: Ohmic and capacitive corrections of the as-measured OER activity**  
153 **of an IrO<sub>2</sub> textile.** The as-measured OER activity of the IrO<sub>2</sub> textile (“raw data”, dashed black  
154 line) is ohmically corrected with the measured ionic resistance of 1.032 Ω. The ohmic-corrected  
155 OER current is then capacitance-corrected by taking an average of forward and backward scans  
156 (Supplementary Fig. 12c) to yield the final electrode OER activity (solid orange line).

157

158

159

160

161

162

163

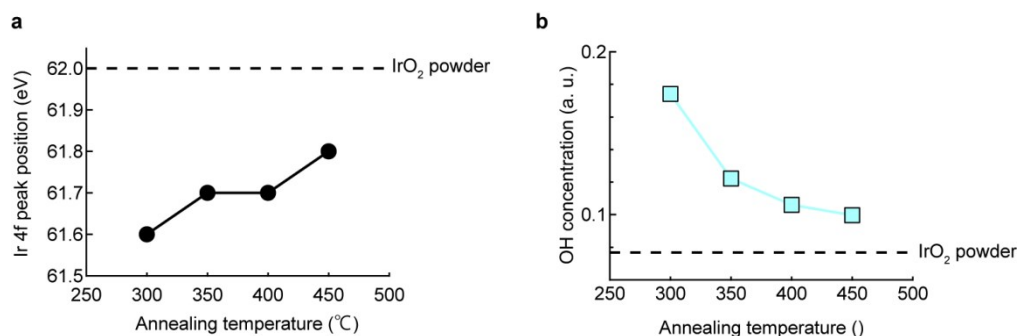

164

165 **Supplementary Fig. 15: XPS analysis for 271 nm ID IrO<sub>2</sub> catalyst textiles of different**  
 166 **annealing temperature (300, 350, 400, and 450 °C). a, Ir 4f peak position for IrO<sub>2</sub> textile.**

167 Dashed line represents peak position for IrO<sub>2</sub> powder. **b, OH concentration estimated from XPS**

168 O 1s spectra (Fig. 5 in the main text). Dashed line represents OH concentration for IrO<sub>2</sub> powder.

169 IrO<sub>2</sub> textiles have a higher OH concentration than IrO<sub>2</sub> powder (**b**). This suggests that the IrO<sub>2</sub>

170 textiles are more reduced, consistent with the lower peak positions of Ir 4f (**a**). Upon annealing,

171 the OH concentration decreased and Ir 4f peak shifts to higher binding energy, indicating

172 oxidization of Ir occurred.

173

174

175  
176  
177  
178  
179  
180  
181  
182  
183  
184  
185  
186  
187  
188  
189  
190  
191  
192  
193  
194

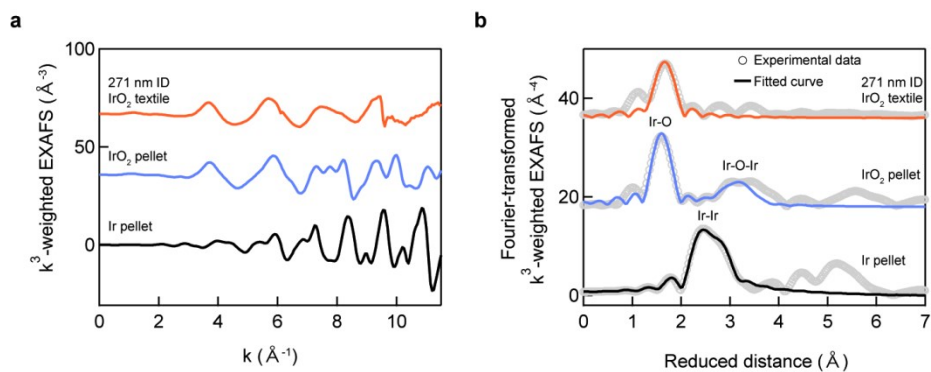

**Supplementary Fig. 16: XAFS spectra of the IrO<sub>2</sub> textile.** **a**,  $k^3$ -weighted EXAFS spectra of the IrO<sub>2</sub> textile and the control samples of Ir and IrO<sub>2</sub> pellets. Fig. 5d in main text. **b**, Fourier transforms of EXAFS spectra for  $k = 2.5$ – $11 \text{ \AA}^{-1}$  and EXAFS simulation. The fitting parameters are summarized in **Supplementary Table 3**.

195

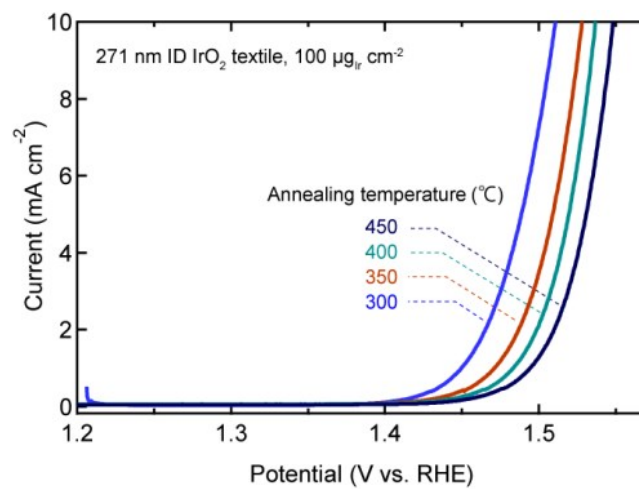

196

197 **Supplementary Fig. 17: LSV curves of IrO<sub>2</sub> textiles annealed at different temperatures.**

198 LSVs obtained for 271 nm ID IrO<sub>2</sub> catalyst textiles of different annealing temperature (300, 350,

199 400, and 450 °C). Ir loading is 100 μg<sub>Ir</sub> cm<sup>-2</sup><sub>geo</sub>.

200

201  
202  
203  
204  
205  
206  
207  
208  
209  
210  
211  
212  
213  
214  
215  
216  
217  
218  
219  
220  
221  
222

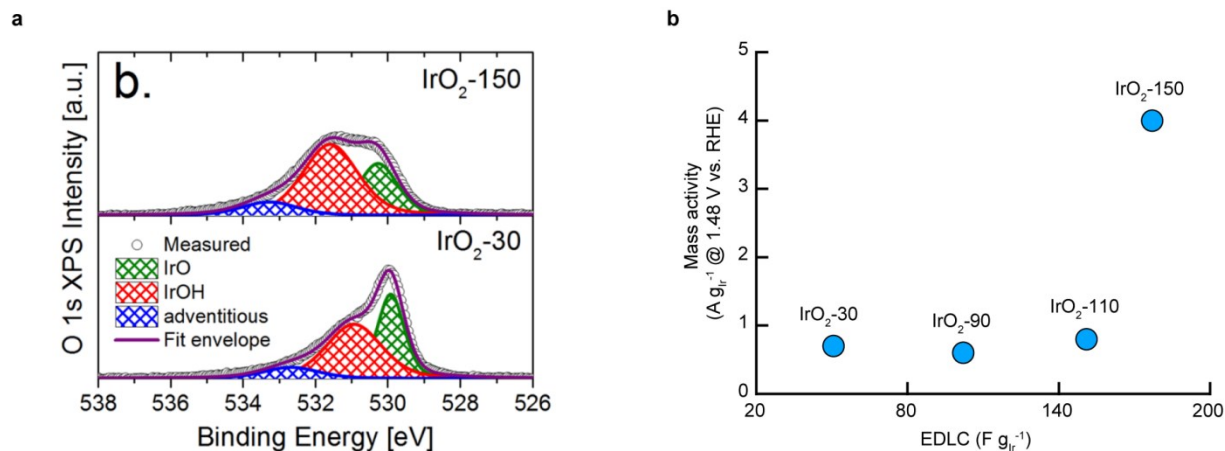

**Supplementary Fig. 18: Mass activity of IrO<sub>2</sub> and their XPS spectra from reference <sup>1</sup> a, O 1s XPS spectra of different IrO<sub>2</sub> samples from Fig. 4b of Ref. <sup>1</sup>. b, Mass activity at 1.48 V vs. RHE with respect to EDLC were calculated and reproduced from Fig. 5a of Ref. <sup>1</sup>, showing the higher activity of samples with OH rich surfaces.**

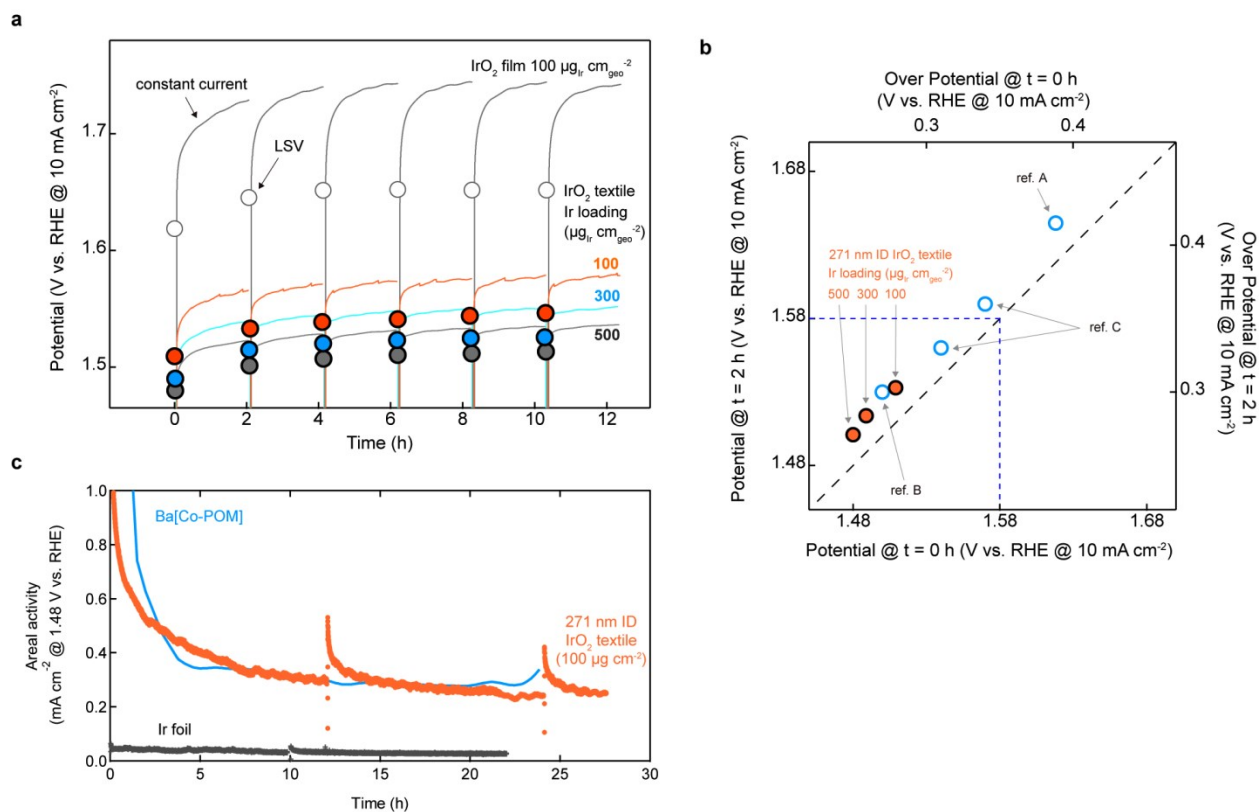

223  
224

225 **Supplementary Fig. 19: Comprehensive plots of catalytic activity and stability.** **a**, Potential  
226 required to reach  $10 \text{ mA cm}^{-2}_{\text{geo}}$  for  $\text{IrO}_2$  textiles with different Ir loadings ( $100$ ,  $300$ , and  $500 \mu\text{g}_{\text{Ir}} \text{ cm}^{-2}_{\text{geo}}$   
227  $\mu\text{g}_{\text{Ir}} \text{ cm}^{-2}_{\text{geo}}$  are represented by filled circles, squares and filled squares) and a flat  $\text{IrO}_2$  film with Ir  
228 loadings of  $100 \mu\text{g}_{\text{Ir}} \text{ cm}^{-2}_{\text{geo}}$  (open circles). After linear sweep voltammetry (LSV), a constant  
229 current of  $10 \text{ mA cm}^{-2}_{\text{geo}}$  was applied for 2 h and the process was repeated. A constant current  
230 produced bubbles and increased the resistivity; thus, the lines connecting the circles for each  
231 sample show the intrinsic potentials to  $\text{IrO}_2$  textiles. **b**, The change in potential after 2 h of  
232 durability testing for  $\text{IrO}_2$  textiles with different Ir loadings; the x-axis represents initial  
233 overpotential and the y-axis represents overpotential after the 2 h of stability testing. For  
234 comparison, the results of previously reported pure  $\text{IrO}_2$  catalysts are plotted as blue open circles  
235 (A: ref. <sup>4</sup>, B: ref. <sup>5</sup>, C: ref. <sup>6</sup>). The catalysts that fall within the region surrounded by blue dashed  
236 lines are suggested to be practically useful<sup>5, 6</sup>. **c**, Areal activity of a 271 nm ID  $\text{IrO}_2$  textile with Ir  
237 loading of  $100 \mu\text{g cm}^{-2}$  and Ir foil at a constant overpotential of 250 mV (or 1.48V vs. RHE),  
238 compared with the result reported previously for Polyoxometalate electrocatalyst ( $\text{Ba}_8$   
239  $[\text{Co}_9(\text{H}_2\text{O})_6(\text{OH})_3(\text{HPO}_4)_2(\text{PW}_9\text{O}_{34})_3] \cdot 55\text{H}_2\text{O}$ ) denoted as  $\text{Ba}[\text{Co-POM}]$ <sup>7</sup>. At 12 and 24 h, the  
240 test was aborted to measure the impedance and continued until 27.5 h for comparison.

241  
242  
243

244

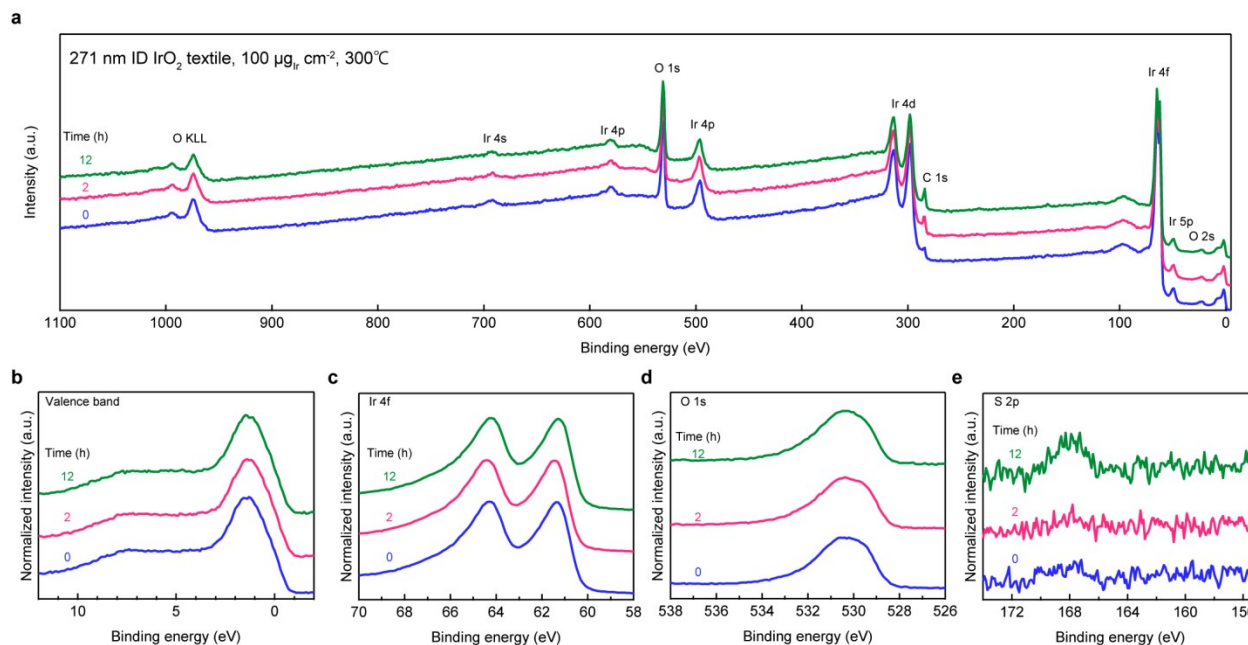

245

246

247 **Supplementary Fig. 20: XPS spectra before and after the stability test for 300 °C annealed**  
 248 **IrO<sub>2</sub> textiles with Ir loading of 100 μg<sub>Ir</sub> cm<sup>-2</sup><sub>geo</sub>.** a, XPS wide scan results and XPS at valence  
 249 bands (b), Ir 4f (c), O 1s (d) and S 2p (e) are shown. A constant overpotential of 250 mV (or  
 250 1.48V vs. RHE) was applied for indicated time in the figures. We observed an increase for S,  
 251 indicating surface poisoning.

252

253

254 **Supplementary Table 1: Summary of the OER activity of pure IrO<sub>2</sub> catalysts**

255 a: Ir loadings were calculated from the catalyst loading and chemical composition. E.g. when the IrO<sub>2</sub> loading is 0.1  
 256 mg, the Ir loading is 0.086 mg = 0.1 × 192 / (192 + 32).

257 b: Calculated using reported electrochemical surface area (ECSA) and 0.627 mFcm<sup>-2</sup> of the areal capacity of IrO<sub>2</sub>  
 258 film in 0.5 M H<sub>2</sub>SO<sub>4</sub>.

259 c: Calculated using reported ECSA and 0.14 mFcm<sup>-2</sup> of the areal capacity of polished glassy carbon electrode in 1 M  
 260 H<sub>2</sub>SO<sub>4</sub>.

261 d: Estimated from the average current between 1 to 1.23 V in the CV curve swept at 20 mV s<sup>-1</sup>.

262 e: Calculated using reported mass activity and TOF.

263 f: Ir(acac)<sub>3</sub> = Iridium acetylacetonate, Ir(CH<sub>3</sub>COCHCOCH<sub>3</sub>)<sub>3</sub>.

264 g: The values were read from electrochemical measurement data.

265 h: Estimated from the current @ 1.48 V vs. RHE and anodic charge reported in the literature.

266 i: Calculated by dividing the current @ 1.48 V vs. RHE by the EDLC (F g<sup>-1</sup>).

267 j: Specific activity is defined as the current @ 1.48 V vs. RHE divided by the ECSA. ECSA is defined as the EDLC  
 268 (mF cm<sub>geo</sub><sup>-2</sup>) of the catalyst divided by 0.035 mF cm<sub>geo</sub><sup>-2</sup>, which is the capacitance of a flat planar electrode in acidic  
 269 media<sup>5</sup>.

270

| Morphology                     | Ir loading (mg <sub>Ir</sub> cm <sup>-2</sup> ) | EDLC (F g <sub>Ir</sub> <sup>-1</sup> ) | Ir source                                         | Electrolyte                          | Potential @ 10 mA cm <sub>geo</sub> <sup>-2</sup> (V vs. RHE) | Mass Activity @ 1.48 V vs. RHE (A g <sub>Ir</sub> <sup>-1</sup> ) | TOF @1.48 V vs. RHE (s <sup>-1</sup> ) | Specific activity @ 1.48 V vs. RHE (μA cm <sup>-2</sup> <sub>ECSA</sub> ) <sup>j</sup> | Ref.                      |      |
|--------------------------------|-------------------------------------------------|-----------------------------------------|---------------------------------------------------|--------------------------------------|---------------------------------------------------------------|-------------------------------------------------------------------|----------------------------------------|----------------------------------------------------------------------------------------|---------------------------|------|
| 271 nm ID textile              | 0.1                                             | 228                                     | Bulk Ir metal                                     | 0.5 M H <sub>2</sub> SO <sub>4</sub> | 1.51                                                          | 36                                                                | 0.159                                  | 5.57                                                                                   | This study (See Table S2) |      |
| Thin film                      | –                                               | –                                       | Ir(CH <sub>3</sub> COO) <sub>n</sub>              | 0.1 M HClO <sub>4</sub>              | 1.55 <sup>g</sup>                                             | –                                                                 | 0.020 <sup>h</sup>                     | 0.70                                                                                   | 8                         |      |
|                                |                                                 |                                         |                                                   |                                      | 1.55 <sup>g</sup>                                             |                                                                   | 0.037 <sup>h</sup>                     | 1.30                                                                                   |                           |      |
|                                |                                                 |                                         |                                                   |                                      | 1.6 <sup>g</sup>                                              |                                                                   | –                                      | –                                                                                      |                           |      |
|                                |                                                 |                                         | Ir(acac) <sub>3</sub> <sup>f</sup>                | 1 M H <sub>2</sub> SO <sub>4</sub>   | 1.45 <sup>g</sup>                                             | –                                                                 | –                                      | 9                                                                                      |                           |      |
|                                |                                                 |                                         |                                                   |                                      | 1.56 <sup>g</sup>                                             |                                                                   |                                        |                                                                                        |                           |      |
| Commercial powder              | 0.012                                           | 158 <sup>b</sup>                        | –                                                 | 0.1 M HClO <sub>4</sub>              | –                                                             | 1.4 <sup>g</sup>                                                  | 0.009 <sup>i</sup>                     | 0.32                                                                                   | 10                        |      |
| Nanoparticle with carbon black | 0.01                                            | 797 <sup>d</sup>                        | Ir(CH <sub>3</sub> COO) <sub>3</sub>              | 0.05 M H <sub>2</sub> SO             | 1.51 <sup>g</sup>                                             | 23 <sup>g</sup>                                                   | 0.029 <sup>i</sup>                     | 1.02                                                                                   | 11                        |      |
| Nanoparticle                   | 0.18 <sup>a</sup>                               | –                                       | K <sub>2</sub> IrCl <sub>6</sub>                  | 0.1 M HClO <sub>4</sub>              | 1.55 <sup>g</sup>                                             | 7.4 <sup>g</sup>                                                  | –                                      | –                                                                                      | 12                        |      |
|                                | 0.77 <sup>a</sup>                               | 124                                     |                                                   | 0.5 M H <sub>2</sub> SO <sub>4</sub> | 1.522                                                         | 4.2 <sup>g</sup>                                                  | 0.034 <sup>i</sup>                     | 1.19                                                                                   | 13                        |      |
|                                | 0.086 <sup>a</sup>                              | 177 <sup>c</sup>                        | Ir(acac) <sub>3</sub> <sup>f</sup>                | 0.1 M HClO <sub>4</sub>              | –                                                             | 4.0                                                               | 0.022 <sup>i</sup>                     | 0.77                                                                                   | 1                         |      |
|                                |                                                 |                                         |                                                   |                                      |                                                               |                                                                   | 0.8 <sup>g</sup>                       | 0.005 <sup>i</sup>                                                                     |                           | 0.18 |
|                                |                                                 |                                         |                                                   |                                      |                                                               |                                                                   | 0.6 <sup>g</sup>                       | 0.006 <sup>i</sup>                                                                     |                           | 0.21 |
|                                |                                                 |                                         |                                                   |                                      |                                                               |                                                                   | 0.7 <sup>g</sup>                       | 0.014 <sup>i</sup>                                                                     |                           | 0.49 |
|                                | 0.043 <sup>a</sup>                              | 116                                     | IrCl <sub>x</sub> ·yH <sub>2</sub> O              | –                                    | 1.67 <sup>g</sup>                                             | 3.5                                                               | 0.030 <sup>i</sup>                     | 1.05                                                                                   | 14                        |      |
|                                | 0.171 <sup>a</sup>                              | 166                                     | K <sub>2</sub> IrCl <sub>6</sub>                  | 0.5 M H <sub>2</sub> SO              | 1.527                                                         | 11.0 <sup>g</sup>                                                 | 0.066 <sup>i</sup>                     | 2.31                                                                                   | 15                        |      |
|                                | 0.153                                           | 104                                     | (NH <sub>4</sub> ) <sub>2</sub> IrCl <sub>6</sub> |                                      | 1.537                                                         | 4.1 <sup>g</sup>                                                  | 0.020 <sup>i</sup>                     | 0.7                                                                                    | 16                        |      |
|                                | 0.214 <sup>a</sup>                              | 334 <sup>c</sup>                        | –                                                 | 1 M H <sub>2</sub> SO <sub>4</sub>   | 1.58 <sup>g</sup>                                             | –                                                                 | –                                      | –                                                                                      | –                         | 6    |
|                                |                                                 |                                         |                                                   |                                      |                                                               |                                                                   |                                        |                                                                                        |                           |      |
| Nanoneedle                     | –                                               | 295 <sup>c</sup>                        | –                                                 | –                                    | 1.54 <sup>g</sup>                                             | –                                                                 | –                                      | –                                                                                      | 17                        |      |
| Nanoporous architecture        | –                                               | –                                       | –                                                 | 0.1 M HClO <sub>4</sub>              | 1.53 <sup>g</sup>                                             | –                                                                 | –                                      | –                                                                                      | –                         |      |

271

272



273

274 **Supplementary Table 2: Summary of EDLC and OER activity of IrO<sub>2</sub> catalyst textiles**275 <sup>a</sup> Calculated by dividing the mass activity (A g<sub>Ir</sub><sup>-1</sup> @ 1.48 V) by the EDLC (F g<sub>Ir</sub><sup>-1</sup>).

276

| Sample                   | ID (nm) | Annealing temperature (°C) | Mass loading (μg <sub>Ir</sub> cm <sup>-2</sup> ) | EDLC             |                                          |                                                     | OER activity                            |                                               |                                                          |                                             |                                                                  |
|--------------------------|---------|----------------------------|---------------------------------------------------|------------------|------------------------------------------|-----------------------------------------------------|-----------------------------------------|-----------------------------------------------|----------------------------------------------------------|---------------------------------------------|------------------------------------------------------------------|
|                          |         |                            |                                                   | Capacitance (mF) | Areal capacitance (mF cm <sup>-2</sup> ) | Mass capacitance (F g <sub>Ir</sub> <sup>-1</sup> ) | Potential (V @ 10 mA cm <sup>-2</sup> ) | Areal activity (mA cm <sup>-2</sup> @ 1.48 V) | Mass activity (A g <sub>Ir</sub> <sup>-1</sup> @ 1.48 V) | TOF (s <sup>-1</sup> @ 1.48 V) <sup>a</sup> | Specific Activity (mA cm <sup>-2</sup> <sub>ECSA</sub> @ 1.48 V) |
| Ir foil                  | -       | -                          | -                                                 | 0.25             | 1.25                                     | -                                                   | 1.615                                   | 0.13                                          | -                                                        | 0.102                                       | 3.57                                                             |
|                          | 151     | 300                        | 100                                               | 4.46             | 22.70                                    | 227                                                 | 1.511                                   | 3.45                                          | 34.46                                                    | 0.152                                       | 5.32                                                             |
|                          | 216     | 300                        | 100                                               | 4.53             | 23.09                                    | 231                                                 | 1.510                                   | 3.47                                          | 34.69                                                    | 0.150                                       | 5.25                                                             |
|                          | 271     | 300                        | 100                                               | 4.48             | 22.84                                    | 228                                                 | 1.511                                   | 3.63                                          | 36.35                                                    | 0.159                                       | 5.57                                                             |
|                          | 482     | 300                        | 100                                               | 3.48             | 17.72                                    | 177                                                 | 1.517                                   | 2.54                                          | 25.39                                                    | 0.143                                       | 5.01                                                             |
| IrO <sub>2</sub> textile | 623     | 300                        | 100                                               | 3.38             | 17.21                                    | 172                                                 | 1.522                                   | 2.51                                          | 25.07                                                    | 0.146                                       | 5.11                                                             |
|                          | 271     | 300                        | 300                                               | 12.33            | 62.82                                    | 209                                                 | 1.490                                   | 7.03                                          | 23.43                                                    | 0.112                                       | 3.92                                                             |
|                          | 271     | 300                        | 500                                               | 19.20            | 97.76                                    | 195                                                 | 1.480                                   | 10.08                                         | 20.17                                                    | 0.103                                       | 3.61                                                             |
|                          | 271     | 350                        | 100                                               | 3.17             | 16.17                                    | 161                                                 | 1.528                                   | 1.48                                          | 14.84                                                    | 0.092                                       | 3.22                                                             |
|                          | 271     | 400                        | 100                                               | 2.19             | 11.15                                    | 111                                                 | 1.537                                   | 0.86                                          | 8.61                                                     | 0.077                                       | 2.70                                                             |
|                          | 271     | 450                        | 100                                               | 1.48             | 7.56                                     | 75                                                  | 1.548                                   | 0.53                                          | 5.29                                                     | 0.070                                       | 2.45                                                             |

277

278

279 **Supplementary Table 3: Coordination number (N), Debye Waller factor ( $\sigma^2$ ), difference in**  
 280 **threshold energy ( $\Delta E_0$ ), and Ir-O bond length (R) obtained from nonlinear least-squares**  
 281 **curve fits of Fourier transforms of EXAFS spectra.**

282

| Sample                   | Shell         | N               | $\sigma^2/\text{\AA}^2$ | $\Delta E_0/\text{eV}$ | R/ \AA            | R-factor |
|--------------------------|---------------|-----------------|-------------------------|------------------------|-------------------|----------|
| Ir pellet                | Ir-Ir         | 12              | $0.0026 \pm 0.0006$     | $9.09 \pm 1.16$        | $2.709 \pm 0.005$ | 0.007    |
| IrO <sub>2</sub> pellet  | Ir-O          | 6               | $0.0008 \pm 0.0016$     | $12.99 \pm 2.45$       | $1.982 \pm 0.012$ | 0.013    |
|                          | Ir-Ir oxide 1 | 2               | $0.0053 \pm 0.0153$     |                        | $3.169 \pm 0.077$ |          |
|                          | Ir-Ir oxide 2 | 8               | $0.0087 \pm 0.0478$     |                        | $3.602 \pm 0.046$ |          |
| IrO <sub>2</sub> textile | Ir-O          | $6.06 \pm 2.55$ | $0.0031 \pm 0.0041$     | $15.96 \pm 4.99$       | $2.036 \pm 0.028$ | 0.039    |

283

284

285 **Supplementary Table 4: Miller indices and corresponding *d*-spacing of IrO<sub>2</sub> rutile, Ir, IrO<sub>2</sub>**  
 286 **pyrite phase, and Pt** <sup>18, 19</sup>.

287

288

289

290

| IrO <sub>2</sub> rutile |                        | Ir fcc     |                        | IrO <sub>2</sub> pyrite |                        | Pt         |                        |
|-------------------------|------------------------|------------|------------------------|-------------------------|------------------------|------------|------------------------|
| <i>hkl</i>              | <i>d</i> -spacing (nm) | <i>hkl</i> | <i>d</i> -spacing (nm) | <i>hkl</i>              | <i>d</i> -spacing (nm) | <i>hkl</i> | <i>d</i> -spacing (nm) |
| 110                     | 0.3178                 | 111        | 0.2217                 | 111                     | 0.27343                | 111        | 0.2266                 |
| 101                     | 0.2582                 | 200        | 0.1920                 | 200                     | 0.23665                | 200        | 0.1963                 |
| 200                     | 0.22488                | 220        | 0.1357                 | 211                     | 0.19336                | 220        | 0.1388                 |
| 210                     | 0.20119                | 311        | 0.1158                 | 220                     | 0.16739                | 311        | 0.1183                 |
| 211                     | 0.1696                 | 222        | 0.1108                 | 311                     | 0.14270                | 222        | 0.1133                 |
| 220                     | 0.15903                | 400        | 0.0960                 | 222                     | 0.13676                | 400        | 0.0981                 |
| 002                     | 0.15771                | 331        | 0.0881                 | 321                     | 0.12648                | 331        | 0.0901                 |
| 310                     | 0.14227                | 420        | 0.0859                 | 400                     | 0.11837                | 420        | 0.0878                 |
| 112                     | 0.14133                | 422        | 0.0784                 | 411                     | 0.11149                | 422        | 0.0801                 |
| 301                     | 0.13542                |            |                        | 331                     | 0.10856                |            |                        |
| 202                     | 0.12914                |            |                        | 420                     | 0.10591                |            |                        |
| 321                     | 0.11604                |            |                        | 422                     | 0.09663                |            |                        |
| 400                     | 0.11247                |            |                        |                         |                        |            |                        |
| 222                     | 0.11199                |            |                        |                         |                        |            |                        |
| 330                     | 0.10602                |            |                        |                         |                        |            |                        |
| 312                     | 0.10563                |            |                        |                         |                        |            |                        |
| 411                     | 0.1031                 |            |                        |                         |                        |            |                        |
| 103                     | 0.1024                 |            |                        |                         |                        |            |                        |
| 420                     | 0.10058                |            |                        |                         |                        |            |                        |
| 213                     | 0.09318                |            |                        |                         |                        |            |                        |
| 402                     | 0.09157                |            |                        |                         |                        |            |                        |
| 510                     | 0.08822                |            |                        |                         |                        |            |                        |
| 332                     | 0.08799                |            |                        |                         |                        |            |                        |
| 431                     | 0.08652                |            |                        |                         |                        |            |                        |
| 303                     | 0.08609                |            |                        |                         |                        |            |                        |
| 422                     | 0.0848                 |            |                        |                         |                        |            |                        |
| 521                     | 0.08075                |            |                        |                         |                        |            |                        |
| 323                     | 0.0804                 |            |                        |                         |                        |            |                        |
| 440                     | 0.07953                |            |                        |                         |                        |            |                        |
| 004                     | 0.07886                |            |                        |                         |                        |            |                        |

291

292 **Supplementary References**

293

**REFERENCES**

294

- 295 1. D. F. Abbott, D. Lebedev, K. Waltar, M. Povia, M. Nachtegaal, E. Fabbri, C. Coperet and T.  
296 J. Schmidt, *Chem. Mater.*, 2016, **28**, 6591-6604.
- 297 2. S. Song, H. Zhang, X. Ma, Z. Shao, R. T. Baker and B. Yi, *Int. J. Hydrog. Energy*, 2008, **33**,  
298 4955-4961.
- 299 3. E. Mayousse, F. Maillard, F. Fouda-Onana, O. Sicardy and N. Guillet, *Int. J. Hydrog.*  
300 *Energy*, 2011, **36**, 10474-10481.
- 301 4. T. Tachikawa, A. Beniya, K. Shigetoh and S. Higashi, *Catal. Lett.*, 2020, **150**, 1976-1984.
- 302 5. C. C. L. McCrory, S. Jung, J. C. Peters and T. F. Jaramillo, *J. Am. Chem. Soc.*, 2013, **135**,  
303 16977-16987.
- 304 6. J. Lim, D. Park, S. S. Jeon, C.-W. Roh, J. Choi, D. Yoon, M. Park, H. Jung and H. Lee, *Adv.*  
305 *Funct. Mater.*, 2018, **28**, 1704796.
- 306 7. M. Blasco-Ahicart, J. Soriano-López, J. J. Carbó, J. M. Poblet and J. R. Galan-Mascaros,  
307 *Nature Chemistry*, 2017, **10**, 24.
- 308 8. T. Reier, D. Teschner, T. Lunkenbein, A. Bergmann, S. Selve, R. Kraehnert, R. Schlögl and  
309 P. Strasser, *Journal of the Electrochemical Society*, 2014, **161**, F876-F882.
- 310 9. R. D. L. Smith, B. Sporinova, R. D. Fagan, S. Trudel and C. P. Berlinguette, *Chem. Mater.*,  
311 2014, **26**, 1654-1659.
- 312 10. F. Godínez-Salomón, L. Albiter, S. M. Alia, B. S. Pivovar, L. E. Camacho-Forero, P. B.  
313 Balbuena, R. Mendoza-Cruz, M. J. Arellano-Jimenez and C. P. Rhodes, *ACS Catal.*, 2018, **8**,  
314 10498-10520.
- 315 11. H. N. Nong, T. Reier, H.-S. Oh, M. Gliech, P. Paciok, T. H. T. Vu, D. Teschner, M. Heggen, V.  
316 Petkov, R. Schlögl, T. Jones and P. Strasser, *Nat Catal.*, 2018, **1**, 841-851.
- 317 12. X. Liang, L. Shi, Y. Liu, H. Chen, R. Si, W. Yan, Q. Zhang, G.-D. Li, L. Yang and X. Zou,  
318 *Angew. Chem.-Int. Edit.*, 2019, **58**, 7631-7635.
- 319 13. L. Yang, G. Yu, X. Ai, W. Yan, H. Duan, W. Chen, X. Li, T. Wang, C. Zhang, X. Huang, J.-S.  
320 Chen and X. Zou, *Nat. Commun.*, 2018, **9**, 5236.
- 321 14. Y. Lee, J. Suntivich, K. J. May, E. E. Perry and Y. Shao-Horn, *J. Phys. Chem. Lett.*, 2012, **3**,  
322 399-404.
- 323 15. J. Chen, P. Cui, G. Zhao, K. Rui, M. Lao, Y. Chen, X. Zheng, Y. Jiang, H. Pan, S. X. Dou and  
324 W. Sun, *Angew. Chem.-Int. Edit.*, 2019, **58**, 12540-12544.
- 325 16. B. M. Tackett, W. Sheng, S. Kattel, S. Yao, B. Yan, K. A. Kuttiyiel, Q. Wu and J. G. Chen,  
326 *ACS Catal.*, 2018, **8**, 2615-2621.
- 327 17. Y.-T. Kim, P. P. Lopes, S.-A. Park, A. Y. Lee, J. Lim, H. Lee, S. Back, Y. Jung, N. Danilovic, V.  
328 Stamenkovic, J. Erlebacher, J. Snyder and N. M. Markovic, *Nat. Comm.*, 2017, **8**, 1449.
- 329 18. Y. Xu, M. Yamazaki and P. Villars, *Jpn. J. Appl. Phys.*, 2011, **50**, 11RH02-11RH02-15.
- 330 19. S. Ono, T. Kikegawa and Y. Ohishi, *Physica B: Condensed Matter*, 2005, **363**, 140-145.

331
